# Supplementary material for: Genotype-specific Digital Twins for Arrhythmia Ablation Targeting in Arrhythmogenic Right Ventricular Cardiomyopathy
Source: Research Square preprint supplement (doi:10.21203/rs.3.rs-8006874/v1), 2025-11-05
Supplement: Supplementary file 1 [file 7b07c187a60b55cc9a04548d.pdf]

## Supplementary Information

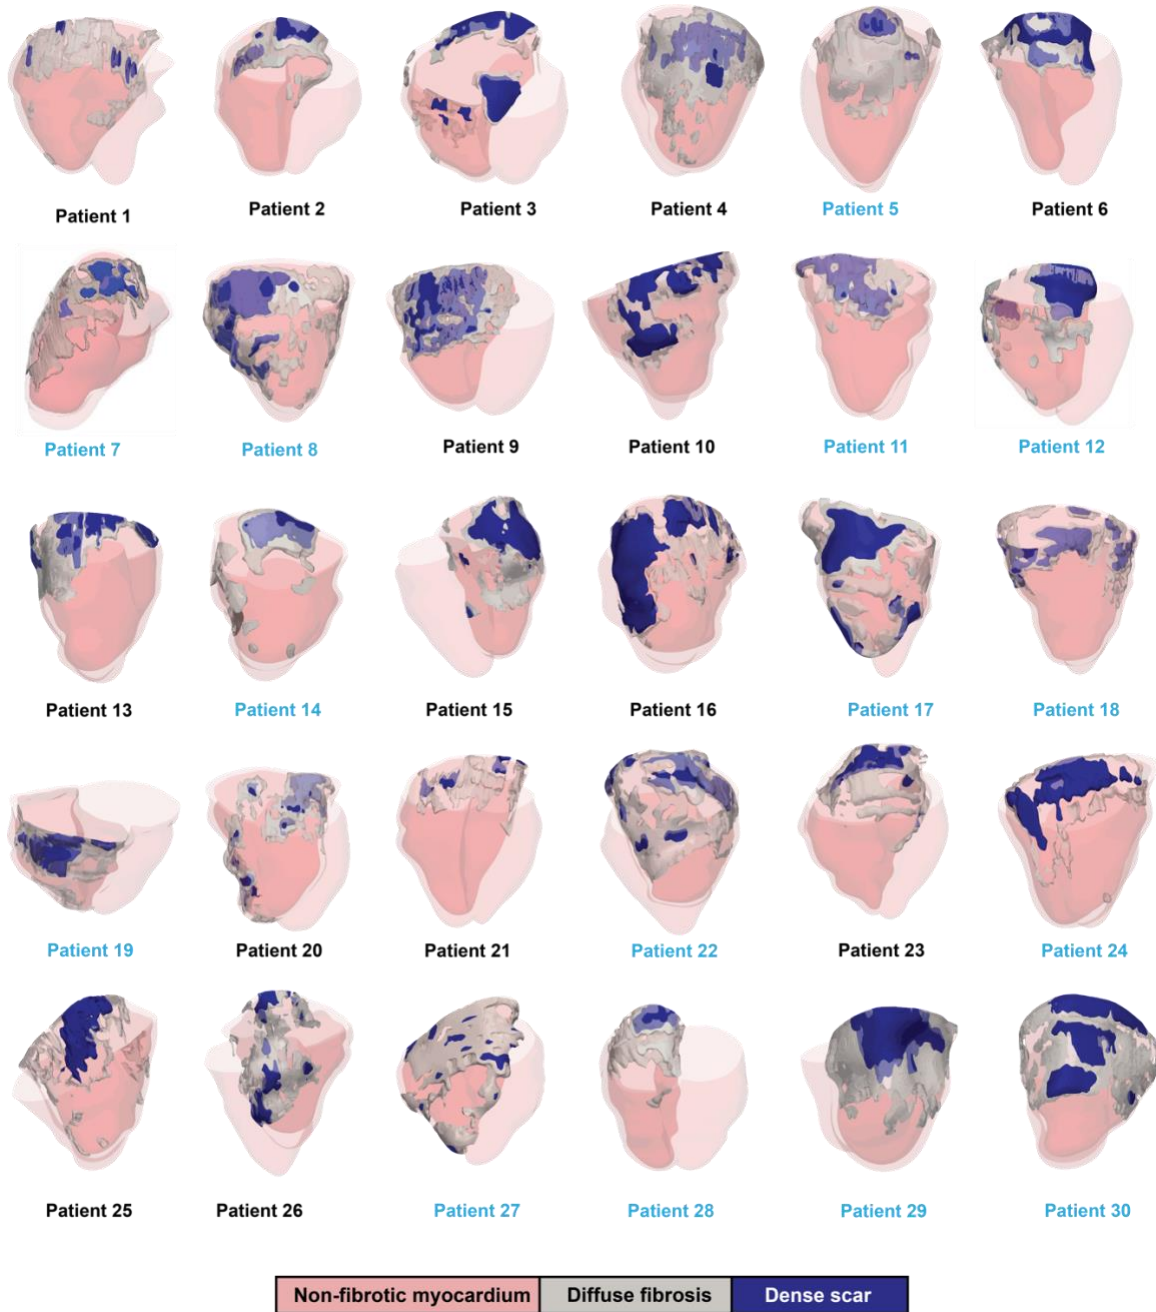

**Figure S1: DT geometrical reconstructions for all 30 ARVC patients.** All the DTs are shown with an opaque RV endocardium and a partially transparent epicardium for visualizing the fibrotic (gray) and scar

(dark blue) distribution. DTs with cyan text are patients with *PKP2* pathogenic variants, and the rest are GE.

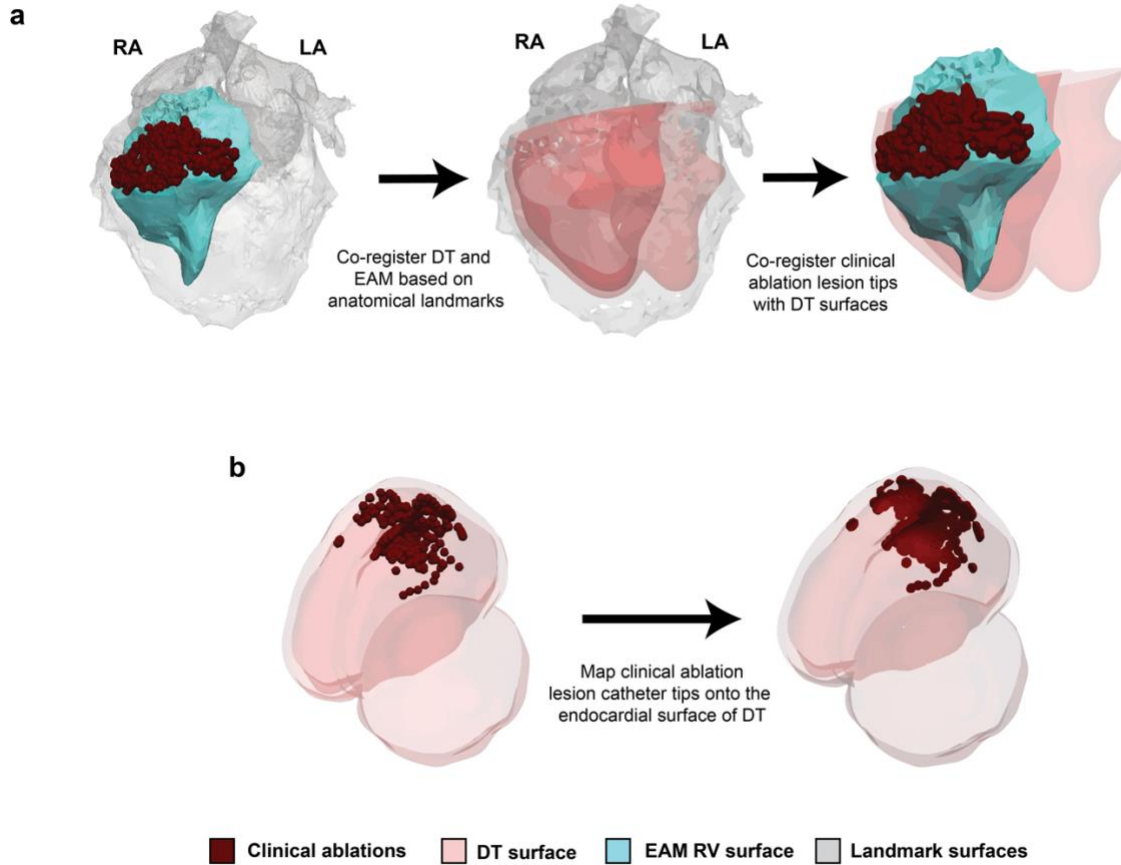

**Figure S2: Registration of EAM geometry and clinical ablation catheter tip locations to the DT**

**surface. a** Anatomical landmarks registered to the EAM surface (left) during the ablation procedure. These landmarks were then registered to the DT's endocardial surface (middle) using a fiducial registration method. The transformation matrix from the fiducial registration was used to co-register the EAM surface and ablation catheter tip locations with the DT (right). **b** Following the registration, the catheter tip points were projected to the closest point on the endocardial surface of the DT. Each projected ablation point was assumed to create a semi-spherical lesion with a radius of 3.5 mm from the endocardial surface (volume up to  $89.83\text{mm}^3$ ). The volume integral of this lesion was calculated to avoid double-counting overlapping regions.

**Table S1 Conduction velocity and conductivity values for different tissue types of the two genotypes.**

| <b>Genotype</b> | <b>Tissue type</b> | <b>Longitudinal<br/>CV (m/s)</b> | <b>Transverse CV<br/>(m/s)</b> | <b>Longitudinal<br/>conductivity (S/m)</b> | <b>Transverse<br/>conductivity<br/>(S/m)</b> |
|-----------------|--------------------|----------------------------------|--------------------------------|--------------------------------------------|----------------------------------------------|
| GE              | Non-fibrotic       | 0.570                            | 0.280                          | 0.132                                      | 0.031                                        |
|                 | Fibrotic           | 0.453                            | 0.150                          | 0.078                                      | 0.011                                        |
|                 | Dense scar         | 0                                | 0                              | 0                                          | 0                                            |
| <i>PKP2</i>     | Non-fibrotic       | 0.342                            | 0.134                          | 0.111                                      | 0.019                                        |
|                 | Fibrotic           | 0.272                            | 0.107                          | 0.033                                      | 0.007                                        |
|                 | Dense scar         | 0                                | 0                              | 0                                          | 0                                            |

m/s: meters per second; S/m: siemens per meter.
